# Supplementary material
Source: Springer Nature journal article supplement (https://www.springermedizin.de/resource/supplementary/13058_2010_2757_MOESM2_ESM.pdf/9702088)

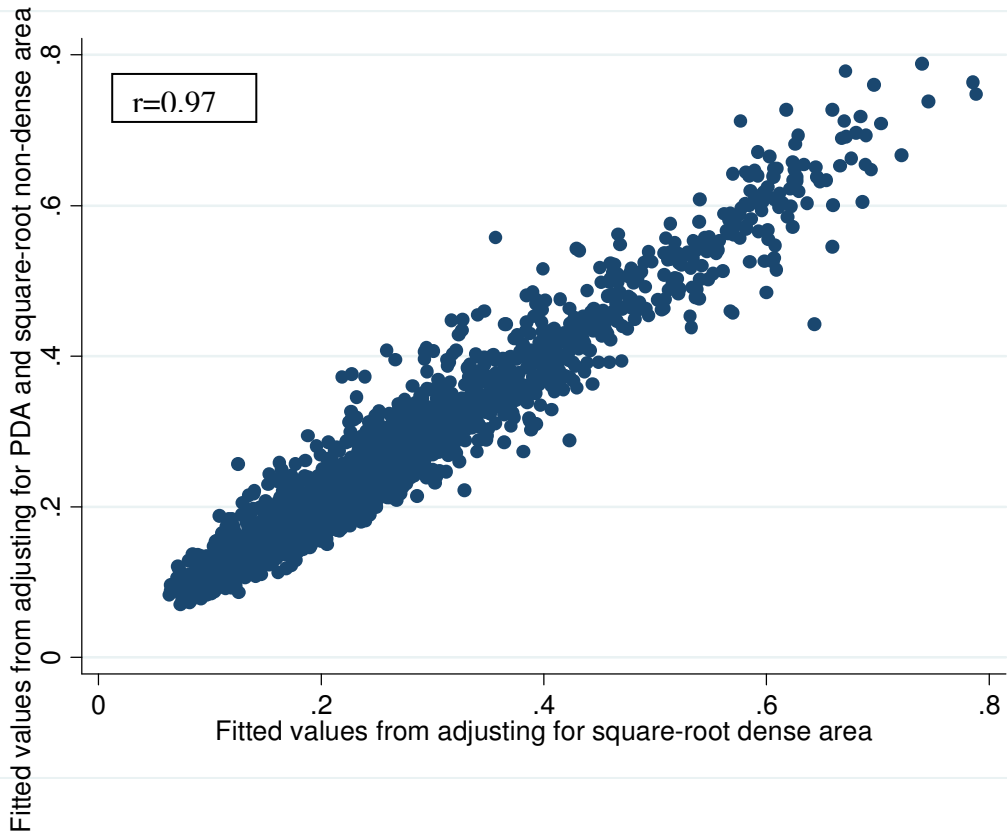

Supplement: MOESM2 [file 9702088]
